# Supplementary material for: Electronic-vibrational density evolution in a perylene bisimide dimer: mechanistic insights into excitation energy transfer
Source: Royal Society of Chemistry journal article supplement (doi:10.1039/d1cp02135d), 2021-01-01
Supplement: d1cp02135d1.pdf [file d1cp02135d1.pdf]

# **Electronic-Vibrational Density Evolution in a Perylene Bisimide Dimer: Mechanistic Insights into Excitation Energy Transfer**

**Sohang Kundu and Nancy Makri**

## Supplementary Information

The detailed electronic-vibrational density evolution described in the article can be seen on a 1-fs time-grid in the 7 animations available as supplementary information. For each animation, the file name, the respective pair of vibrational modes as well as the relevant section and figure in the article is mentioned.

1. File name – V1.mp4  
Modes involved – q23A and q23B  
Section 4A, Left panel of Figure 4.
2. File name – V2.mp4  
Modes involved – q25A and q25B  
Section 4A, Right panel of Figure 4
3. File name – V3.mp4  
Modes involved – q25A and q23A  
Section 4B, Left panel of Figure 5
4. File name – V4.mp4  
Modes involved – q25A and q28A  
Section 4B, Middle panel of Figure 5
5. File name – V5.mp4  
Modes involved – q25A and q27A  
Section 4B, Right panel of Figure 5
6. File name – V6.mp4  
Modes involved – q23A and q23B, projected density  
Section 4C, Left panel of Figure 6
7. File name – V7.mp4  
Modes involved – q25A and q25B, projected density  
Section 4C, Right panel of Figure 6
